# Supplementary material
Source: HighWire-hosted journal article supplement (https://www.cmajopen.ca/highwire/filestream/81021/field_highwire_adjunct_files/0/open-2015-0071-1-at.pdf)
Supplement: open-2015-0071-1-at.pdf [file open-2015-0071-1-at.pdf]

## Appendix 1 (as supplied by the authors): Web survey

### Welcome / Bienvenue

- Voir cette page en Français?

(if selected, the following questions would be in French)

#### A. Information about yourself

##### What is your age?

- 18-24  
 25-29  
 30-39  
 40-44  
 45-54  
 55-59  
 60-64  
 65-79  
 80+

##### Please select your gender?

- Female  
 Male  
 Other \_\_\_\_\_

##### Which province or territory is your primary residence?

- Alberta  
 British Columbia  
 Manitoba  
 New Brunswick  
 Newfoundland and Labrador  
 Northwest Territories  
 Nova Scotia  
 Nunavut  
 Ontario  
 Prince Edward Island  
 Quebec  
 Saskatchewan  
 Yukon

##### What is your highest level of education?

- Less than high school  
 High school graduate

Appendix to: Bansback N, Harrison M, Sadatsfavi M, et al. Attitude to health risk in the Canadian population: a cross-sectional survey. *CMAJ Open* 2016. DOI:10.9778/cmajo.20150071.

- Some post-secondary
- Post-secondary graduate
- Greater than post-secondary (e.g. doctoral/professional degree)

**What is your employment status?**

- Employed, full time
- Employed, part time
- Unemployed, but looking for work
- Unemployed, but not looking for work
- Student
- Retired
- Other

**What is your household income? (Canadian Dollars)**

- Less than \$30,000
- \$30,000 to \$59,999
- \$60,000 to \$99,999
- \$100,000 to \$150,000
- More than \$150,000
- Prefer not to disclose



**C. Questions on your ability and preference for using and understanding health information.**

**How confident are you filling out medical forms yourself?**

- Not at all
- A little bit
- Somewhat
- Quite a bit
- Extremely

**How often do you have someone (like a family member, friend, hospital/clinic worker, or caregiver) help you read hospital materials?**

- Never
- Occasionally
- Sometimes
- Often
- Always

**How often do you have problems learning about your medical condition because of difficulty understanding written information?**

- Never
- Occasionally
- Sometimes
- Often
- Always

**For each of the following questions, please check the box that best reflects how good you are at doing the following things:**

How good are you at working with fractions?                                   

**Not at all good**      **Extremely good**

How good are you at working with percentages?                                   

**Not at all good**      **Extremely good**

How good are you at calculating a 15% tip?                                   

**Not at all good**      **Extremely good**

How good are you at figuring out how much a shirt will cost if it is 25% off?                                   

**Not at all good**      **Extremely good**

**For each of the following questions, please check the box that best reflects your answer:**

When reading the newspaper, how helpful do you find tables and graphs that are parts of a story?                                   

**Not at all helpful**      **Extremely helpful**

When people tell you the chance of something happening, do you prefer that they use words (“it rarely happens”) or numbers (“there’s a 1% chance”)?

**Always  
prefer  
words**

**Always  
prefer  
numbers**

When you hear a weather forecast, do you prefer predictions using percentages (e.g., “there will be a 20% chance of rain today”) or predictions using only words (e.g., “there is a small chance of rain today”)?

**Always  
prefer  
percentages**

**Always  
prefer words**

How often do you find numerical information to be useful?

**Never**

**Very Often**

**Which treatment do you prefer, treatment A or treatment B?**

|                                                                                                                                                                                                                         |                       |
|-------------------------------------------------------------------------------------------------------------------------------------------------------------------------------------------------------------------------|-----------------------|
| <p><b>Treatment A</b></p>  <p>5 people out of 100 will have to stop taking the treatment due to a temporary reaction to the drug</p>  | <input type="radio"/> |
| <p><b>Treatment B</b></p>  <p>10 people out of 100 will have to stop taking the treatment due to a temporary reaction to the drug</p> | <input type="radio"/> |
| <p><b>Unsure</b></p>                                                                                                                                                                                                    | <input type="radio"/> |

(if select Treatment A or unsure)

If the chance of withdrawal from Treatment B is more likely than the chance of withdrawal from Treatment A, how much more likely do you think it is?

The chance of withdrawal from Treatment B is **[1-10]** times more likely than the chance of withdrawal from Treatment A.

(if select Treatment B)

If the chance of withdrawal from Treatment A is more likely than the chance of withdrawal from Treatment B, how much more likely do you think it is?

The chance of withdrawal from Treatment A is **[1-10]** times more likely than the chance of withdrawal from Treatment B.

**END**
